# Supplementary material for: Nickel-catalyzed electrocarboxylation of allylic halides with CO2
Source: Royal Society of Chemistry journal article supplement (doi:10.1039/d1nj02006d), 2021-01-01
Supplement: d1nj02006d1.pdf [file d1nj02006d1.pdf]

Electronic Supplementary Material (ESI) for New Journal of Chemistry.

This journal is © The Royal Society of Chemistry and the Centre National de la Recherche Scientifique 2021

## Supplementary Information

### Nickel-catalyzed electrocarboxylation of allylic halides with CO<sub>2</sub>

La-Xia Wu,<sup>a</sup> Fang-Jie Deng,<sup>a</sup> Lin Wu,<sup>a</sup> Huan Wang,<sup>b</sup> Tai-jie Chen,<sup>a</sup> Ye-Bin Guan<sup>\*a</sup> and Jia-Xing Lu<sup>\*\*b</sup>

#### Contents

|                                                           |    |
|-----------------------------------------------------------|----|
| Materials and Instrument .....                            | S2 |
| Infrared characterization of Nickel(II) Complexes.....    | S2 |
| Electrochemical behavior of Ni(dppm)Cl <sub>2</sub> ..... | S2 |
| NMR characterization.....                                 | S3 |
| References .....                                          | S8 |

## 1. Materials and Instrument

Galvanostatic electrosynthesis was performed using a digital direct current-regulated power supply (HY3005MT, HYelec® China). Voltammetric measurements were conducted using electrochemical station (CHI660E, Chenhua) in a conventional three-electrode cell. The product yield was determined by high-performance liquid chromatography (HPLC) instrument (DIONEX Ultimate 3000 pump) (Thermo Scientific, Germering, Germany) equipped with a UV (RS Variable Wavelength) (Thermo Scientific, Germering, Germany) detector.  $^1\text{H}$ NMR spectra were recorded on an AVANCE 500 (500 MHz, Bruker, Germany) spectrometer in  $\text{CDCl}_3$  with  $\text{Me}_4\text{Si}$  as an internal standard. All substrates, vinylacetic acid (**2d**) were used as received (Energy chemical, China). MeCN were kept over 4 Å molecular sieves.

## 2. Infrared characterization of Nickel(II) Complexes

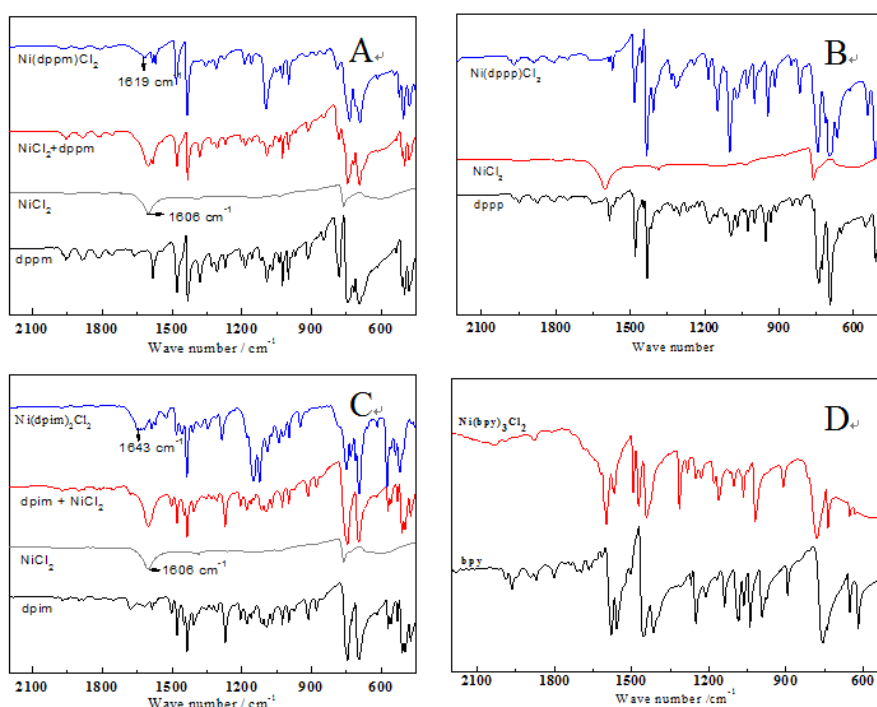

Fig.S1 IR of  $\text{Ni}(\text{dppm})\text{Cl}_2$  (A);  $\text{Ni}(\text{dppp})\text{Cl}_2$  (B);  $\text{Ni}(\text{dpim})_2\text{Cl}_2$  (C);  $\text{Ni}(\text{bpy})_3\text{Cl}_2$  (D).

## 3. Electrochemical behavior of $\text{Ni}(\text{dppm})\text{Cl}_2$ .

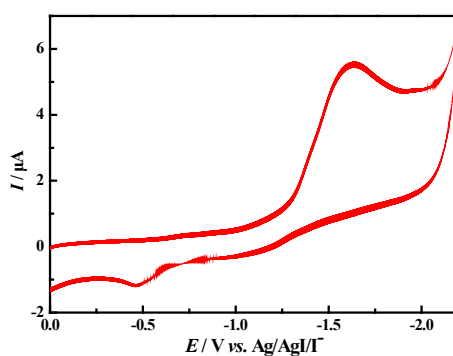

Fig. S2 CV of  $\text{Ni}(\text{dppm})\text{Cl}_2$  in DMF-TEAI solution at 10 °C saturated with  $\text{N}_2$  on GC electrode at a sweep rate of 100  $\text{mV} \cdot \text{s}^{-1}$ .

#### 4. NMR characterization

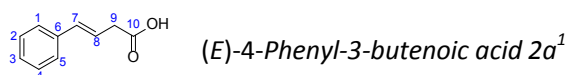

$^1\text{H}$  NMR (500 MHz,  $\text{CDCl}_3$ )  $\delta$  7.43-7.38 (m, 2H), 7.34 (t,  $J = 7.6$  Hz, 2H), 7.28-7.24 (m, 1H), 6.55 (d,  $J = 15.9$  Hz, 1H), 6.31 (dt,  $J = 15.9, 7.1$  Hz, 1H), 3.33 (dd,  $J = 7.1, 1.4$  Hz, 2H).  $^{13}\text{C}$  NMR (101 MHz,  $\text{CDCl}_3$ )  $\delta$  178.24 (C-10), 136.66 (C-6), 134.05 (C-7), 128.60 (C-2, C-4), 127.74 (C-3), 126.37 (C-1, C-5), 120.80 (C-8), 38.08 (C-9) ppm.

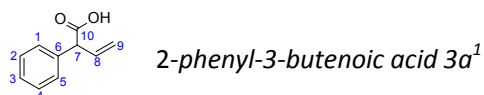

$^1\text{H}$  NMR (500 MHz,  $\text{CDCl}_3$ )  $\delta$  7.44 -7.29 (m, 5H), 6.24 (ddd,  $J = 17.7, 10.2, 8.0$  Hz, 1H), 5.40-5.05 (m, 2H), 4.36 (d,  $J = 8.0$  Hz, 1H).  $^{13}\text{C}$  NMR (101 MHz,  $\text{CDCl}_3$ )  $\delta$  178.71 (C-10), 137.40 (C-6), 135.00 (C-8), 128.86 (C-2, C-4), 128.15 (C-1, C-5), 127.67 (C-3), 118.15 (C-9), 55.58 (C-7) ppm.

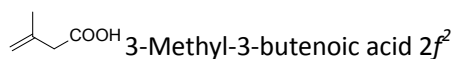

$^1\text{H}$  NMR (500 MHz,  $\text{CDCl}_3$ )  $\delta$  4.98 (p,  $J = 1.6$  Hz, 1H), 4.91 (t,  $J = 1.5$  Hz, 1H), 3.11 (d,  $J = 1.2$  Hz, 2H), 1.86 (s,  $J = 1.1$  Hz, 3H) ppm.

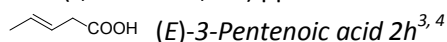

$^1\text{H}$  NMR (400 MHz,  $\text{CDCl}_3$ )  $\delta$  9.55 (s, 1H), 5.82-5.40 (m, 2H), 3.12 (dd,  $J = 6.9, 6.6$  Hz, 2H), 1.79-1.56 (m, 3H) ppm.

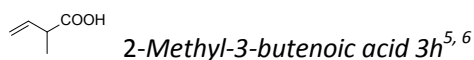

$^1\text{H}$  NMR (400 MHz,  $\text{CDCl}_3$ )  $\delta$  10.69 (s, 1H), 5.94 (ddd,  $J = 17.4, 10.3, 7.4$  Hz, 1H), 5.27-5.09 (m, 2H), 3.19 (pt,  $J = 7.1, 1.2$  Hz, 1H), 1.31 (d,  $J = 7.0$  Hz, 3H) ppm.

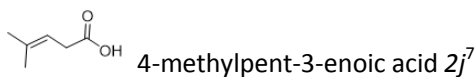

$^1\text{H}$  NMR (500 MHz,  $\text{CDCl}_3$ )  $\delta$  6.07 (dd,  $J = 10.0, 10.0$  Hz, 1H), 5.19-5.12 (m, 2H), 1.35 (s, 6H) ppm.

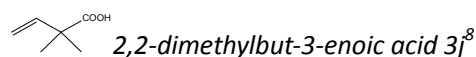

$^1\text{H}$  NMR (500 MHz,  $\text{CDCl}_3$ )  $\delta$  5.33-5.29 (m, 1H), 3.10 (d,  $J = 10.0$  Hz, 2H), 1.77 (d,  $J = 5.0$  Hz, 3H), 1.66 (d,  $J = 5.0$  Hz, 3H).

WLY0808-1.1.fid  
WLY0808-1

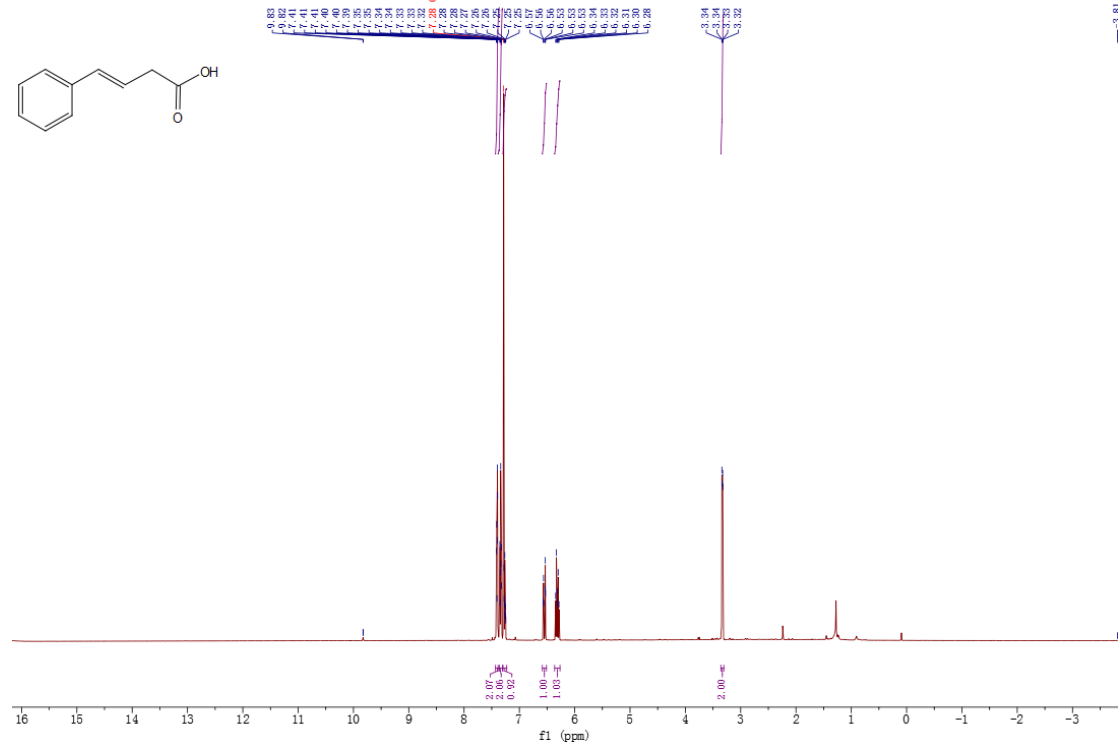

<sup>1</sup>H NMR (500 MHz, CDCl<sub>3</sub>) of (E)-phenyl-3-butenic acid **2a**

WLY20190110-1-CNMR. 10.fid

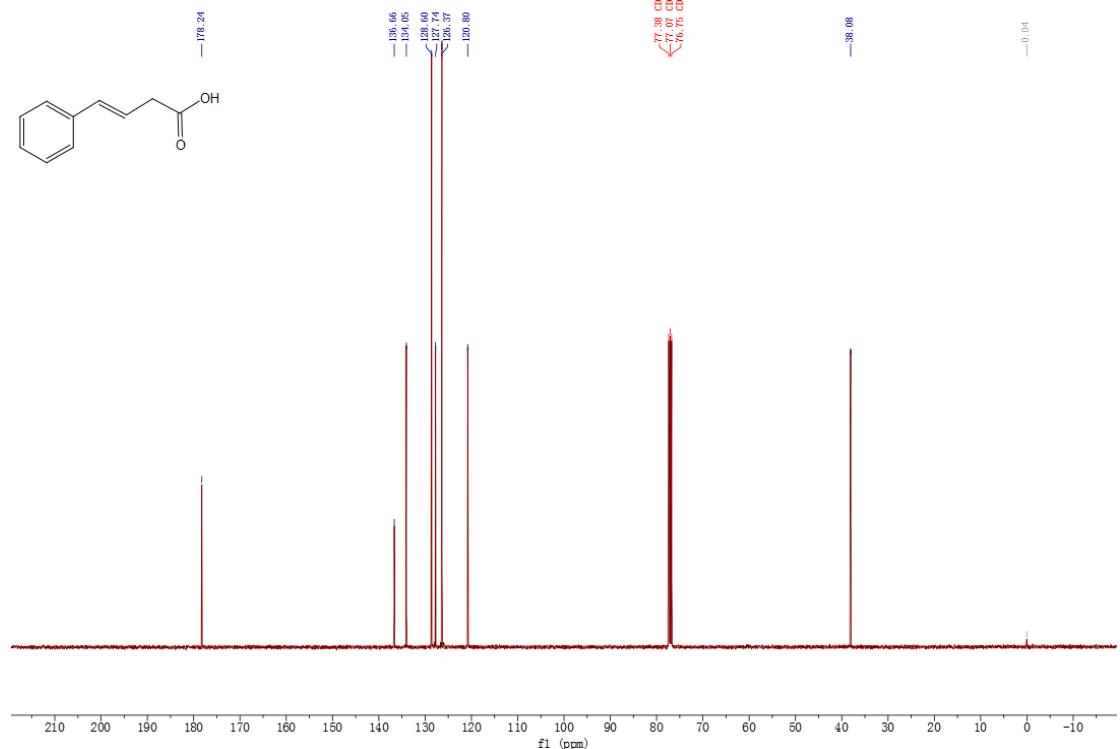

<sup>13</sup>C NMR (101 MHz, CDCl<sub>3</sub>) of (E)-phenyl-3-butenic acid **2a**

wlx0812-1.1.fid  
wlx0812-1

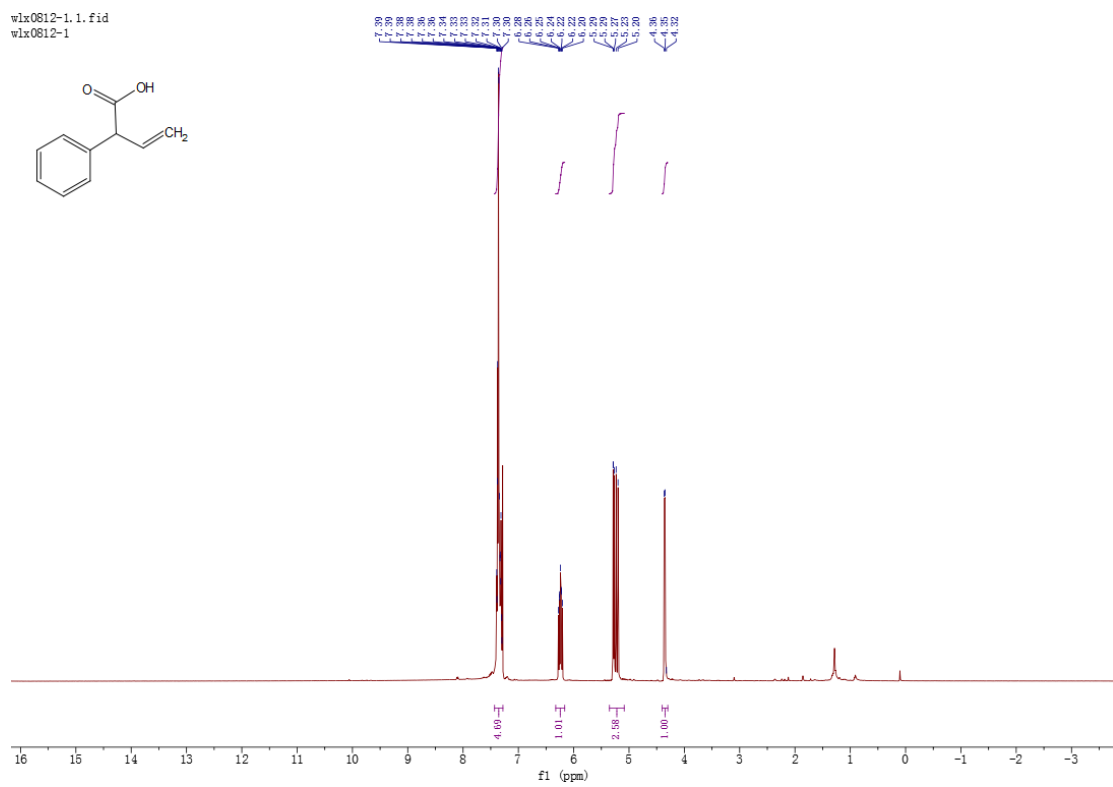

<sup>1</sup>H NMR (500 MHz, CDCl<sub>3</sub>) of 2-phenyl-3-butenoic acid **3a**

WLX20190110-2-CNMR.10.fid

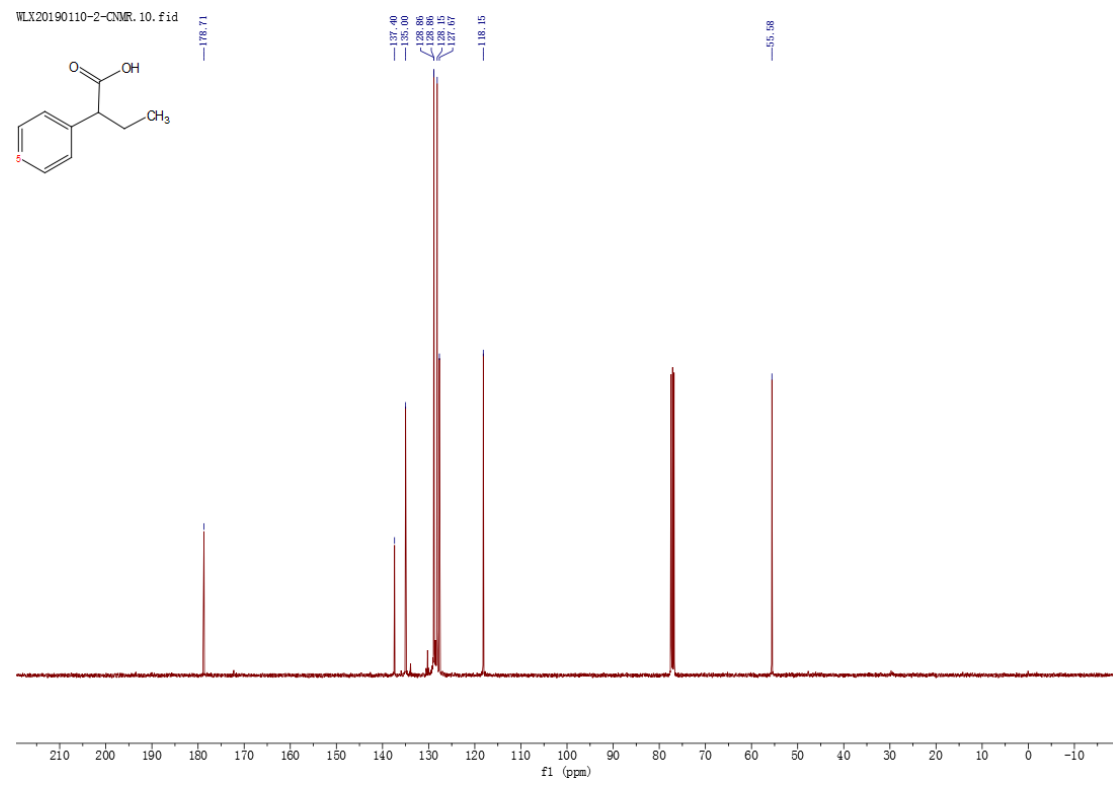

<sup>13</sup>C NMR (101 MHz, CDCl<sub>3</sub>) of 2-phenyl-3-butenoic acid **3a**

WLX0608-2.1.fid  
WLX0608-2

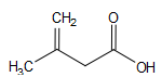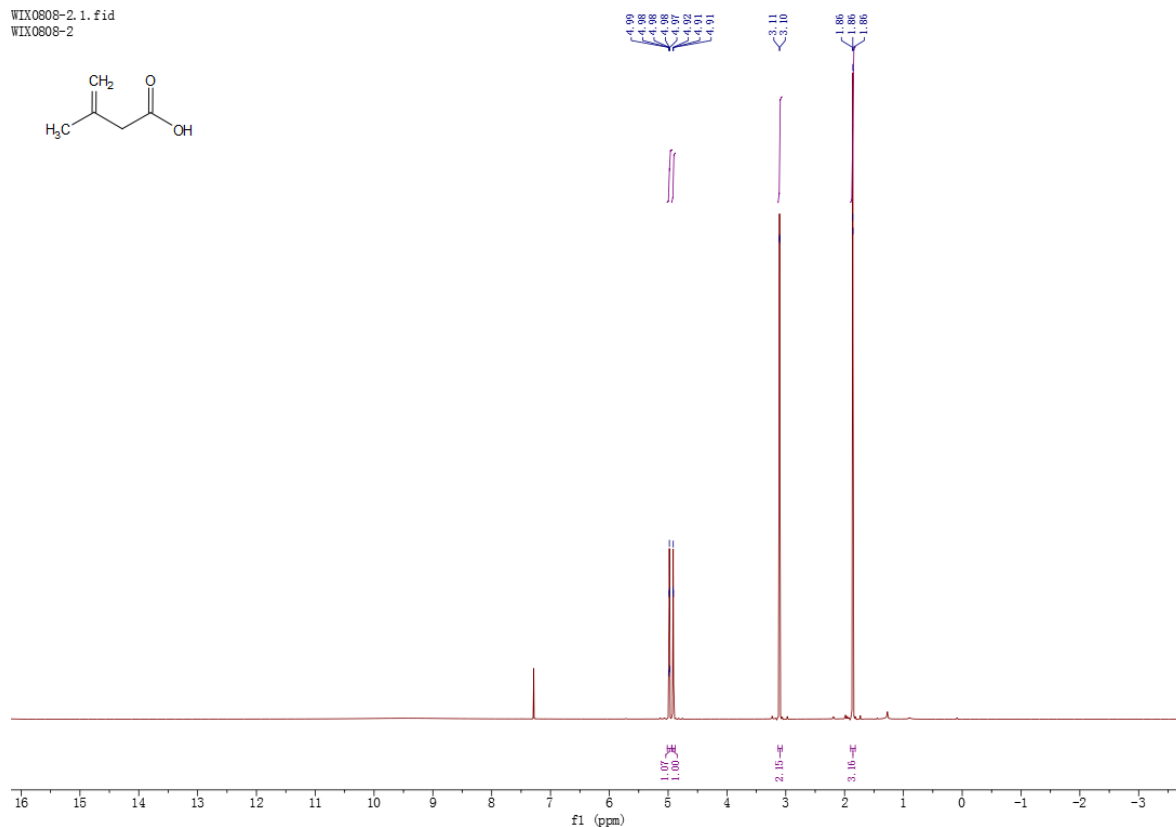

<sup>1</sup>H NMR (500 MHz, CDCl<sub>3</sub>) of 3-Methyl-3-butenoic acid **2f**

WLX20190114-1.10.fid

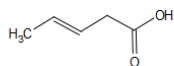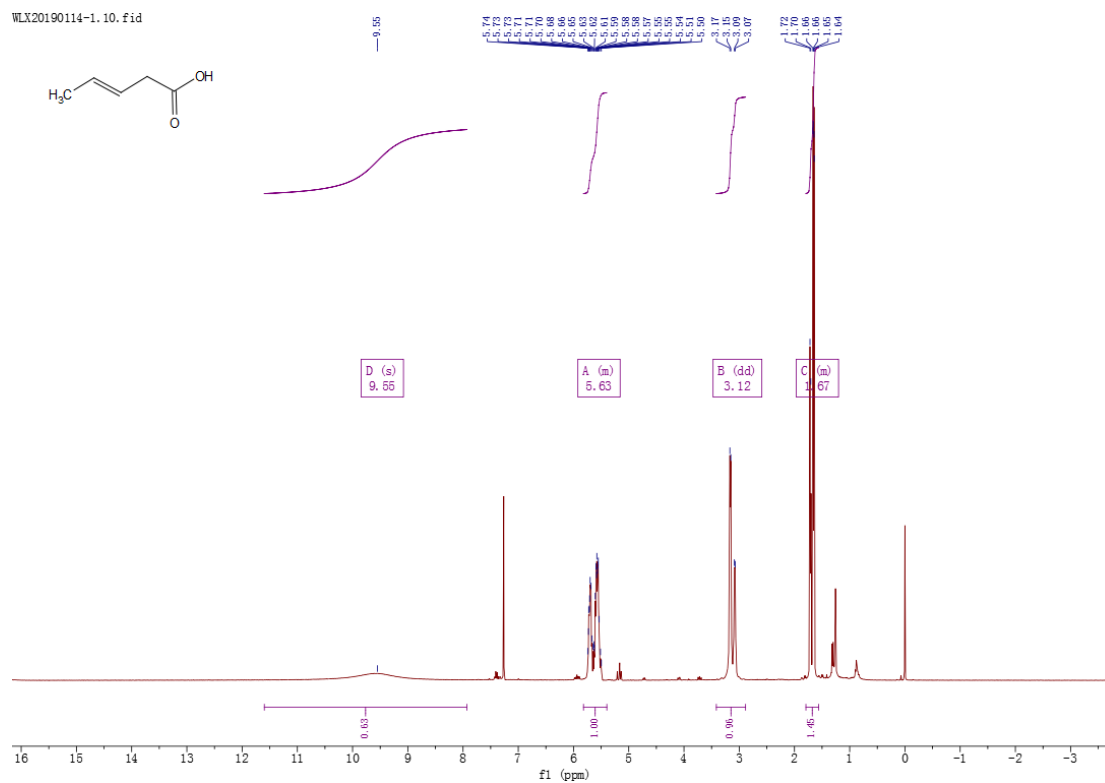

<sup>1</sup>H NMR (400 MHz, CDCl<sub>3</sub>) of (*E*)-3-pentenoic acid **2h**

WLY20190110-3.10.fid

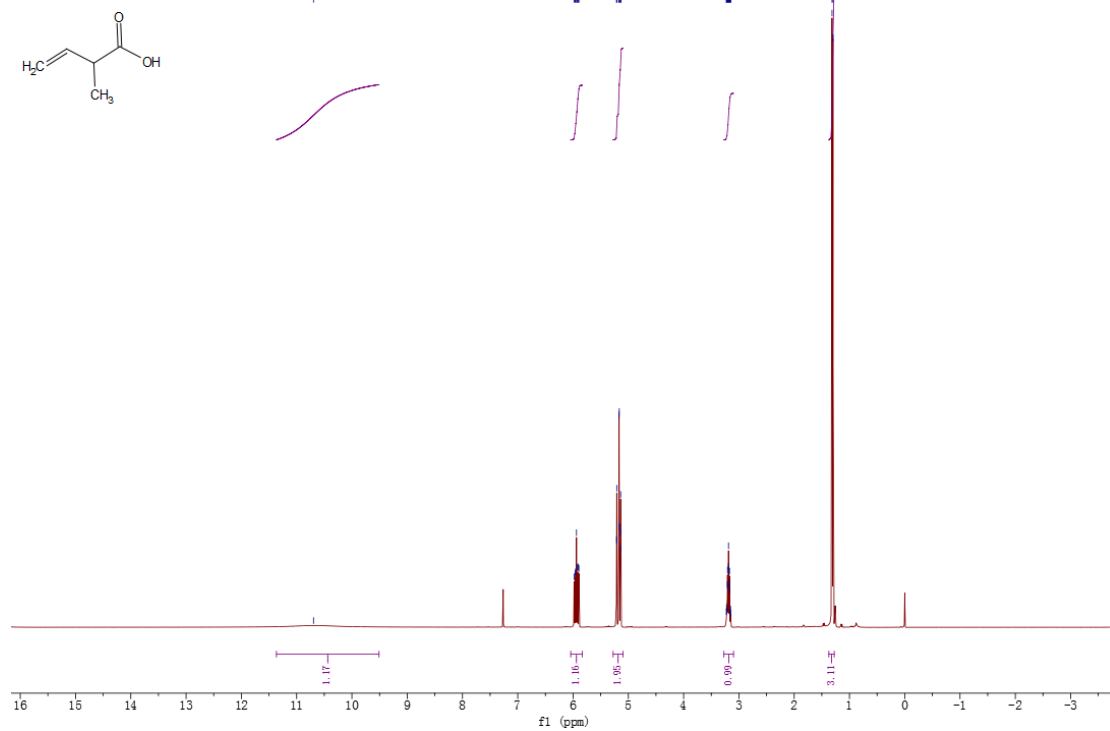

<sup>1</sup>HNMR (400 MHz, CDCl<sub>3</sub>) of 2-Methyl-3-butenoic acid **3h**

wlx-1 20190730.1.fid  
wlx-1 20190730

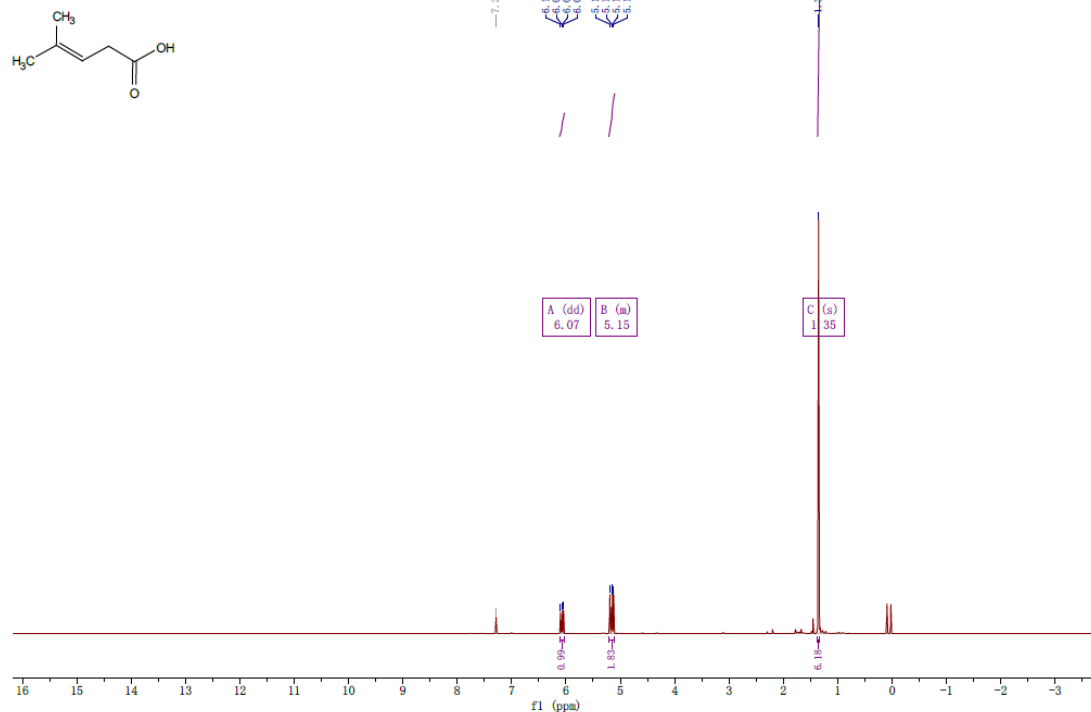

<sup>1</sup>HNMR (500 MHz, CDCl<sub>3</sub>) of 4-methylpent-3-enoic acid **2j**

wlx-2 20190730.2.fid  
wlx-2 20190730

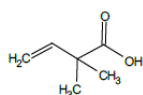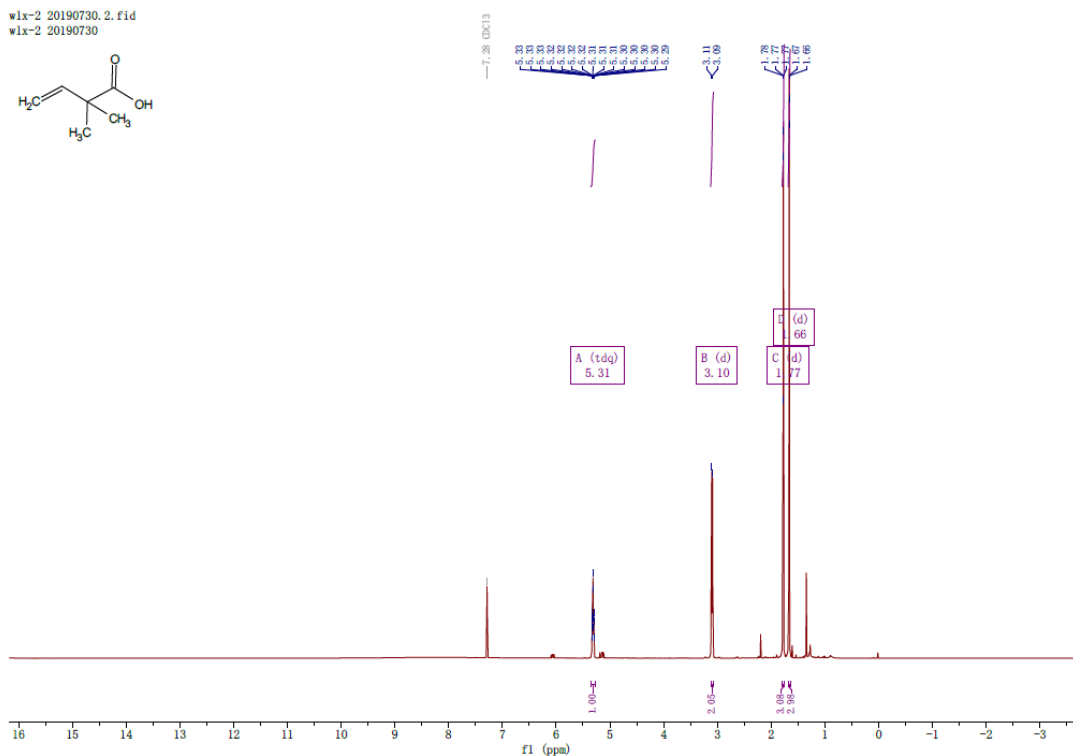

<sup>1</sup>HNMR (500 MHz, CDCl<sub>3</sub>) of 2,2-dimethylbut-3-enoic acid 3j

## Reference

1. L.-X. Wu, Y.-G. Zhao, Y.-B. Guan, H. Wang, Y.-C. Lan, H. Wang and J.-X. Lu, *RSC Advances*, 2019, **9**, 32628-32633.
2. D.-F. Niu, L.-P. Xiao, A.-J. Zhang, G.-R. Zhang, Q.-Y. Tan, J.-X. Lu, *Tetrahedron*, 2008, **64**, 10517–10520.
3. J. Thibonnet, M. Abarbri, J.-L. Parrain and A. Duchêne, *Tetrahedron*, 2003, **59**, 4433-4441.
4. S. J. Zhang, W. X. Hu, *Synthetic Communications*, 2010, **40**, 3093-3100.
5. H. A. Duong, P. B. Huleatt, Q. W. Tan and E. L. Shuying, *Org Lett*, 2013, **15**, 4034-4037.
6. B. Miao and S. Ma, *Chem Commun*, 2014, **50**, 3285-3287.
7. S. M. Smith, N. C. Thacker and J. M. Takacs, *J Am Chem Soc*, 2008, **130**, 3734-3735.
8. Z. Gu, A. Zakarian, *Org. Lett.*, 2011, **13**, 1080-1082.
